# Supplementary material for: Adsorption of Carbon Dioxide, Methane, and Nitrogen Gases onto ZIF Compounds with Zinc, Cobalt, and Zinc/Cobalt Metal Centers
Source: Hindawi journal article supplement (doi:10.1155/2019/6130152), 2019-12-23
Supplement: f1 [file 6130152.f1.pdf]

## Supplementary Data File

### Adsorption of Carbon Dioxide, Methane and Nitrogen Gases onto ZIF Compounds with Zinc, Cobalt and Zinc/Cobalt Metal Centers

Ahmed Awadallah-F<sup>(a),1</sup>, Febrian Hillman<sup>(b)</sup>, Shaheen A. Al-Muhtaseb<sup>(a),\*</sup> Hae-Kwon Jeong<sup>(b), (c)</sup>

*(a) Department of Chemical Engineering, Qatar University, P.O. Box 2713, Doha, Qatar*

*(b) Artie McFerrin Department of Chemical Engineering and (c) Department of Materials Science and Engineering, Texas A&M University, College Station, TX 77843-3122, United States*

#### Contents

S1. Regression of mass transfer coefficients

#### Page

2

## S1. Regression of mass transfer coefficients

**Table S1** summarizes the Regression of mass transfer coefficients for the adsorption of nitrogen, methane and carbon dioxide gases onto different adsorbents of ZIFs; ZIF, Co-ZIF-8, Zn/ Co-ZIF-8.

**Table S1.** Regression and the coefficients of determination ( $R^2$ ) for the overall mass transfer coefficient ( $10^4 \times k$ ,  $s^{-1}$ ) against ( $1/P$ ,  $MPa^{-1}$ ) for adsorption of methane, nitrogen and carbon dioxide gases on ZIF-8, Co-ZIF-8 and Zn/Co-ZIF-8 adsorbents at different temperatures.

| Sample      | $T$ ( $^{\circ}C$ ) | Nitrogen                             | Methane                              | Carbon dioxide                      |
|-------------|---------------------|--------------------------------------|--------------------------------------|-------------------------------------|
| ZIF-8       | 25                  | $5.51/P - 4.41$<br>( $R^2 = 0.95$ )  | $8.96/P - 0.42$<br>( $R^2 = 0.90$ )  | $0.40/P + 0.06$<br>( $R^2 = 0.90$ ) |
|             | 35                  | $5.90/P + 5.97$<br>( $R^2 = 0.93$ )  | $10.63/P + 0.84$<br>( $R^2 = 0.99$ ) | $0.45/P + 0.33$<br>( $R^2 = 0.95$ ) |
|             | 45                  | $6.16/P + 6.86$<br>( $R^2 = 0.97$ )  | $12.88/P - 1.82$<br>( $R^2 = 0.99$ ) | $0.47/P + 0.34$<br>( $R^2 = 0.98$ ) |
|             | 55                  | $7.18/P + 5.79$<br>( $R^2 = 0.98$ )  | $16.48/P - 2.94$<br>( $R^2 = 0.99$ ) | $0.95/P - 0.44$<br>( $R^2 = 0.86$ ) |
| Co-ZIF-8    | 25                  | $7.95/P + 125$<br>( $R^2 = 0.93$ )   | $5.80/P + 2.74$<br>( $R^2 = 0.99$ )  | $0.55/P - 0.02$<br>( $R^2 = 0.97$ ) |
|             | 35                  | $11.41P + 127$<br>( $R^2 = 0.97$ )   | $8/P + 0.95$<br>( $R^2 = 0.99$ )     | $0.67/P - 0.04$<br>( $R^2 = 0.99$ ) |
|             | 45                  | $18.17/P + 122$<br>( $R^2 = 0.91$ )  | $8.95/P - 0.11$<br>( $R^2 = 0.99$ )  | $0.73/P - 2.22$<br>( $R^2 = 0.99$ ) |
|             | 55                  | $20.22/P + 130$<br>( $R^2 = 0.93$ )  | $10.33/P + 0.54$<br>( $R^2 = 0.99$ ) | $0.79/P - 0.39$<br>( $R^2 = 0.99$ ) |
| Zn/Co-ZIF-8 | 25                  | $68.88/P - 1.70$<br>( $R^2 = 0.99$ ) | $2.66/P + 5.51$<br>( $R^2 = 0.99$ )  | $3.55/P - 1.58$<br>( $R^2 = 0.99$ ) |
|             | 35                  | $67.30/P - 0.30$<br>( $R^2 = 0.99$ ) | $2.57/P + 8.36$<br>( $R^2 = 0.90$ )  | $3.71/P - 1.53$<br>( $R^2 = 0.98$ ) |
|             | 45                  | $73.99/P - 1.56$<br>( $R^2 = 0.99$ ) | $3.04/P + 8.60$<br>( $R^2 = 0.90$ )  | $3.82/P - 1.79$<br>( $R^2 = 0.99$ ) |
|             | 55                  | $69.56/P + 0.44$<br>( $R^2 = 0.97$ ) | $4.08/P + 7.96$<br>( $R^2 = 0.98$ )  | $3.86/P - 0.81$<br>( $R^2 = 0.94$ ) |
